# Supplementary material for: Heterojunction Cu2O/RGO/BiVO4ternary nanocomposites with enhanced photocatalytic activities towards degradation of rhodamine B and tetracycline hydrochloride
Source: Royal Society of Chemistry journal article supplement (doi:10.1039/c9nj04351a), 2019-01-01
Supplement: c9nj04351a1.pdf [file c9nj04351a1.pdf]

## Heterojunction $\text{Cu}_2\text{O}/\text{RGO}/\text{BiVO}_4$ Ternary Nanocomposites with Enhanced Photocatalytic Activities towards Degradation of Rhodamine B and Tetracycline Hydrochloride

Xiaoying Hu<sup>a</sup>, Qi Zhang<sup>a</sup>, Haoshan Nan<sup>a</sup>, Ming Wang<sup>a</sup>, Liang Qiao<sup>a</sup>, Hongwei Tian<sup>b\*</sup>

<sup>a</sup> College of Science and Laboratory of Materials Design and Quantum Simulation, Changchun University, Changchun, 130022, China;

<sup>b</sup> Key Laboratory of Automobile Materials of MOE and School of Materials Science and Engineering, Jilin University, Changchun, 130012, China.

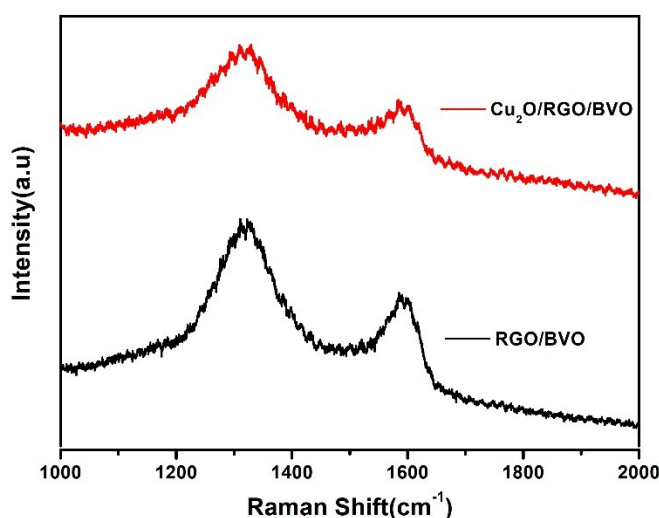

Fig. S1 Raman spectra of the  $\text{RGO}/\text{BiVO}_4$  and  $\text{Cu}_2\text{O}/\text{RGO}/\text{BiVO}_4$ .

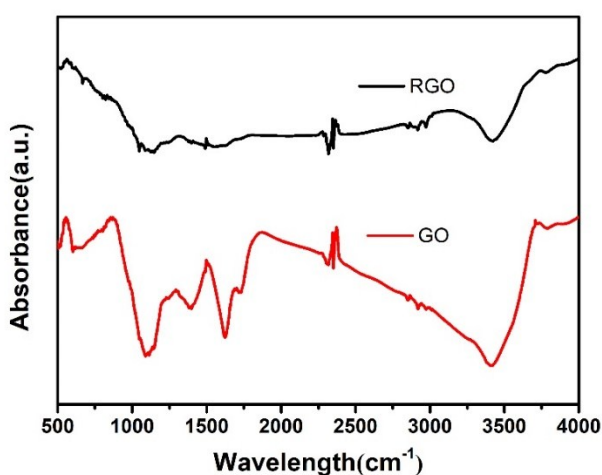

Fig. S2 FTIR spectra of the as-prepared samples GO and RGO.

---

\*Corresponding authors: tianhw@jlu.edu.cn (H.W. Tian).

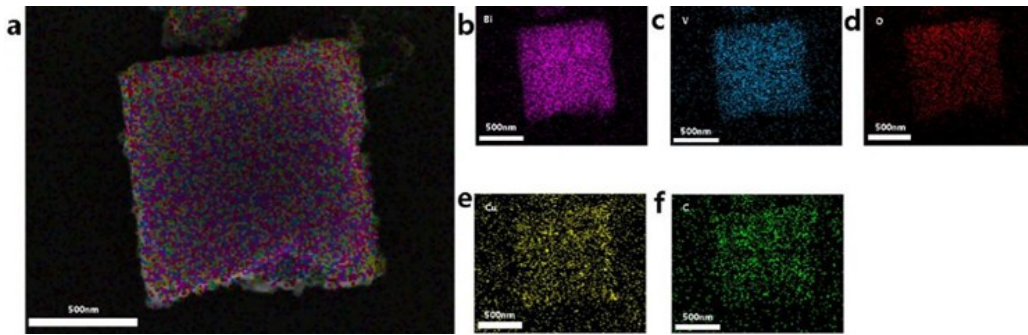

Fig.S3 The elemental mapping patterns of 5%Cu<sub>2</sub>O/RGO/BiVO<sub>4</sub>.

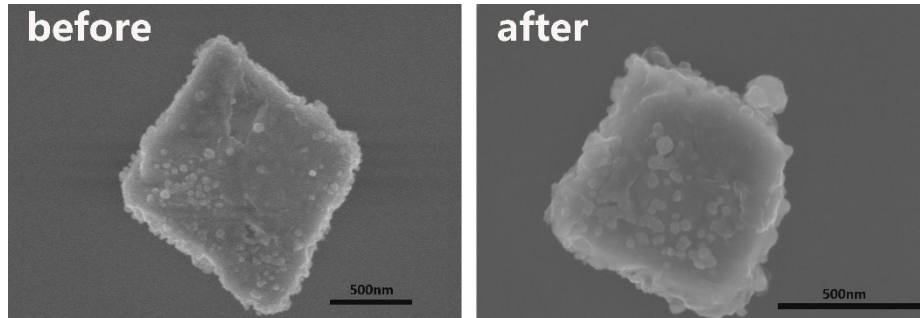

Fig.S4 SEM images of 5%Cu<sub>2</sub>O/RGO/BiVO<sub>4</sub> before and after cycling stability testing.

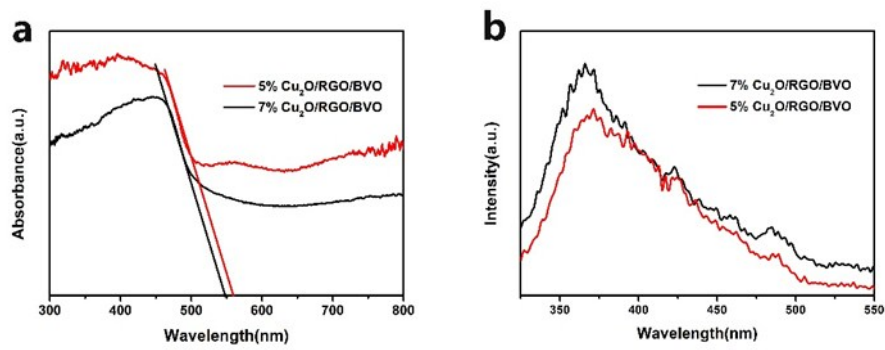

Fig.S5. UV-vis diffuse reflectance spectra(a), Photoluminescence (PL) spectra(b) of 5%Cu<sub>2</sub>O/RGO/BVO and 7%Cu<sub>2</sub>O/RGO/BVO

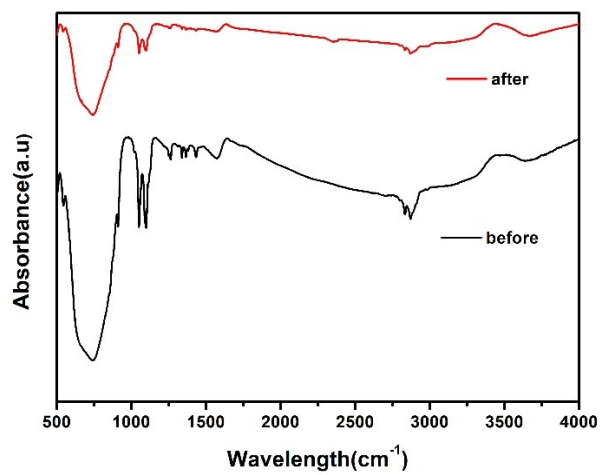

Fig.S6 FTIR spectra of 5%Cu<sub>2</sub>O/RGO/BiVO<sub>4</sub> before and after cycling stability testing.

Table 1. Comparison of degradation of dye over reported BiVO<sub>4</sub> based composites.

| Catalysts                                                    | Light source                               | degradation rate (30min) | Ref.      |
|--------------------------------------------------------------|--------------------------------------------|--------------------------|-----------|
| Cu <sub>2</sub> O/RGO/BiVO <sub>4</sub>                      | 300 W Xe lamp<br>$\lambda > 420$ nm        | 90%                      | This work |
| CeVO <sub>4</sub> /RGO aerogel/BiVO <sub>4</sub>             | 300 W Xe lamp<br>$\lambda > 420$ nm        | 50%                      | 1         |
| RGO/CN/BVO                                                   | 300W Solar Simulator<br>$\lambda > 420$ nm | 39%                      | 2         |
| Ag/Ag <sub>3</sub> PO <sub>4</sub> /BiVO <sub>4</sub> /RGO   | 300 W Xe lamp<br>$\lambda > 400$ nm        | 90%                      | 3         |
| Ag@g-C <sub>3</sub> N <sub>4</sub> @BiVO <sub>4</sub>        | 300 W Xe lamp<br>$\lambda > 420$ nm        | 70%                      | 4         |
| g-C <sub>3</sub> N <sub>4</sub> /BiVO <sub>4</sub>           | 300 W Xe lamp<br>$\lambda > 420$ nm        | 90%                      | 5         |
| BiVO <sub>4</sub> /TiO <sub>2</sub>                          | 300 W Xe lamp<br>$\lambda > 420$ nm        | 30%                      | 6         |
| AgI/rGO/BiVO <sub>4</sub>                                    | 300W Xe lamp<br>$\lambda > 420$ nm         | 100%                     | 7         |
| $\beta$ -Ag <sub>2</sub> MoO <sub>4</sub> /BiVO <sub>4</sub> | 300W Xe lamp<br>$\lambda > 420$ nm         | 40%                      | 8         |

1. Q. Liu, J. Shen, X. Yang, T. Zhang and H. Tang, *Applied Catalysis B: Environmental*, 2018, 232, 562-573.
2. D. Jiang, P. Xiao, L. Shao, D. Li and M. Chen, *Industrial & Engineering Chemistry Research*, 2017, 56, 8823-8832.
3. F. Chen, Q. Yang, X. Li, G. Zeng, D. Wang, C. Niu, J. Zhao, H. An, T. Xie and Y. Deng, *Applied Catalysis B: Environmental*, 2017, 200, 330-342.
4. F. Chen, Q. Yang, Y. Wang, J. Zhao, D. Wang, X. Li, Z. Guo, H. Wang, Y. Deng, C. Niu and G. Zeng, *Applied Catalysis B: Environmental*, 2017, 205, 133-147.
5. Y. Wang, G. Tan, T. Liu, Y. Su, H. Ren, X. Zhang, A. Xia, L. Lv and Y. Liu, *Applied Catalysis B: Environmental*, 2018, 234, 37-49.
6. Y. Hu, D. Li, H. Wang, G. Zeng, X. Li and Y. Shao, *Journal of Molecular Catalysis A: Chemical*, 2015, 408, 172-178.
7. S. K. Lakhera, H. Y. Hafeez, R. Venkataramana, P. Veluswamy, H. Choi and B. Neppolian, *Applied Surface Science*, 2019, 487, 1289-1300.

8. Y. Chen, X. Xie, Y. Si, P. Wang and Q. Yan, *Applied Surface Science*, 2019, DOI: 10.1016/j.apsusc.2019.143860, 143860.
